# Supplementary material for: Identifying optimal bioinformatics protocols for aerosol microbial community data
Source: PeerJ. 2021 Sep 30;9:e12065. doi: 10.7717/peerj.12065 (PMC8487624; doi:10.7717/peerj.12065)
Supplement: Supplemental Information 6 — Environmental data for samples and controls taken as part of the Urban Parks study. [file peerj-09-12065-s006.xlsx]

## Sheet: Sheet1
Sample Ref	Control type	All controls	Lab controls	DNA quant pre PCR	DNA quant post 16S PCR	Time – NZ	Date – NZ	Time – UTC	Date – UTC	Time window	Location	Park area (m2)	Elevation sample point (m above sea level)	Sample point N	Sample point E	UTM E	UTM N	UTM Zone	Shortest dist to sea (km)	Temp (oC)	wind av (m/s)	wind max (m/s)	Humidity (%)	Weather commentary	Wind direction	Weather	Particle counts	Particle count total	Water	Birds	Trees	Dogs	Cars	Park Size	3 day trajectory	1 day trajectory cluster	1 week trajectory cluster
P1	Sample	Sample	Sample	<0.05	0.921441	2.10pm	2017-07-16	02:00:00	2017-07-16	Winter	Rural location	NA	100	-36.348	174.353	262482	5.9742e+06	60H	4.9	17.3	NA	NA	67.2	Wind 290 W, 80% cloud, light wind,	W	Overcast	0.3 26/ 0.5 26/ 1 26/ 3 24/ 5 21/ 10 8	131	N	N	N	N	N	Medium	3	4	3
P2	Control – sampling	Control	Sample	0.03	0.212471	11.50am	2017-07-25	00:00:00	2017-07-25	Winter	Aotea Square	0	21	-36.8523	174.763	300568	5.91917e+06	60H	1.3	NA	NA	NA	NA	NA	NA	NA	NA	NA	N	Y	N	N	Y	Small	NA	NA	NA
P3	Sample	Sample	Sample	0.08	0.817958	11.50am	2017-07-25	1900-01-01	2017-07-25	Winter	Aotea Square	0	21	-36.8523	174.763	300568	5.91917e+06	60H	1.3	18.8	NA	NA	66.2	No wind. Sunny/showers while sampling. Next to grass and ice rink, some birds and people.	NA	Rain	0.3 64/ 0.5 64/ 1 63/ 3 52/ 5 43/ 10 12	298	N	Y	N	N	Y	Large	4	4	3
P4	Sample	Sample	Sample	0.06	0.296138	11.00am	2017-07-26	23:00:00	2017-07-25	Winter	Aotea Square	0	21	-36.8523	174.763	300568	5.91917e+06	60H	1.3	19.1	NA	NA	54.4	Sunny. Light - no wind. Dry. Cars, people, birds nearby. Wind from South.	NA	Fine	0.3 68/ 0.5 68/ 1 67/ 3 57/ 5 48/ 10 2	310	N	Y	N	N	Y	Large	5
P5	Sample	Sample	Sample	<0.05	1.09098	2.25pm	2017-08-08	02:00:00	2017-08-08	Winter	Aotea Square	0	21	-36.8523	174.763	300568	5.91917e+06	60H	1.3	17.3	NA	NA	81.6	Moderate to light wind, E, overcast, people and birds around.	E	Overcast	0.3 104/ 0.5 103/ 1 101/ 3 84/ 5 66/ 10 22	480	N	Y	N	N	Y	Medium	1	3	3
P6	Sample	Sample	Sample	0.05	1.93756	2.00pm	2017-09-14	02:00:00	2017-09-14	Winter	Rural location	NA	100	-36.348	174.353	262482	5.9742e+06	60H	4.9	18.7	NA	NA	78.1	Overcast, dry, light to moderate S wind, dogs, people, mud, some dust from road nearby, farm animals - cows and turkeys.	S	Overcast	0.3 126/ 0.5 124/ 1 122/ 3 106/ 5 82/ 10 27	587	N	N	N	N	N	Small	4	3	4
P7	Control – sampling	Control	Sample	0.03	0.755207	2.00pm	2017-09-14	02:00:00	2017-09-14	Winter	Rural location	NA	100	-36.348	174.353	262482	5.9742e+06	60H	4.9	NA	NA	NA	NA	NA	NA	NA	NA	NA	N	N	N	N	N	Large	NA	NA	NA
-P7	Control – extraction	Control	Control	<0.05	0.847682	NA	NA	NA	NA	NA	NA	NA	NA	NA	NA	NA	NA	NA	NA	NA	NA	NA	NA	NA	NA	NA	NA	NA	N	N	N	N	N	Large	NA	NA	NA
P21	Sample	Sample	Sample	0.09	1.58307	12.00pm	2017-07-12	00:00:00	2017-07-12	Winter	Western Springs	1850000	13	-36.8649	174.722	296971	5.91769e+06	60H	1.5	15.1	NA	NA	54.4	Sunny light wind (W). Near lake and birds. Dry.	W	Fine	0.3 41/ 0.5 41/ 1 40/ 3 35/ 5 30/ 10 12	199	Y	Y	N	N	N	Large	2	2	6
P22	Control – sampling	Control	Sample	0.03	2.59369	12.00pm	2017-07-12	00:00:00	2017-07-12	Winter	Western Springs	1850000	13	-36.8649	174.722	296971	5.91769e+06	60H	1.5	NA	NA	NA	NA	NA	NA	NA	NA	NA	Y	Y	N	N	N	Large	NA	NA	NA
P23	Sample	Sample	Sample	0.01	1.63592	2.05pm	2017-07-12	02:00:00	2017-07-12	Winter	Mt Albert Park	404963	103	-36.8902	174.72	296864	5.91488e+06	60H	2.4	14.9	NA	NA	63.2	Sunny/showers. Just rained when started sampling. Nearish to trees. Off leash dog area. Light-no wind.	NA	Rain	0.3 57/ 0.5 57/ 1 56/ 3 48/ 5 40/ 10 15	273	N	N	Y	N	N	Large	2
P24	Sample	Sample	Sample	0.01	1.19116	3.55pm	2017-07-12	04:00:00	2017-07-12	Winter	Warren Freer Park	14097	36	-36.8835	174.737	298281	5.91566e+06	60H	4	8.6	NA	NA	85.1	Sun/rain. Rained for some of sampling. Light SW wind.	SW	Rain	0.3 41/ 0.5 41/ 1 41/ 3 36/ 5 29/ 10 8	196	N	N	N	N	N	Medium	2	1	5
P25	Sample	Sample	Sample	0.06	6.87503	10.10am	2017-07-14	22:00:00	2017-07-13	Winter	Mt Eden Domain	348552	153	-36.875	174.765	300813	5.91667e+06	60H	2.8	11.3	NA	NA	79.8	On long grass near trees. Reasonable elevation. Cloudy, some sun, Light E wind, dry.	E	Overcast	0.3 49/ 0.5 49/ 1 48/ 3 41/ 5 34/ 10 11	232	N	N	N	N	N	Small	3	1	5
P27	Control – sampling	Control	Sample	0.05	2.45497	12.15pm	2017-07-14	00:00:00	2017-07-14	Winter	The Museum	710007	63	-36.8592	174.775	301678	5.91844e+06	60H	1.4	NA	NA	NA	NA	NA	NA	NA	NA	NA	N	N	N	N	N	Large	NA	NA	NA
P29	Sample	Sample	Sample	0.01	7.35281	2.20pm	2017-07-27	02:00:00	2017-07-27	Winter	Western Springs	1850000	13	-36.8649	174.722	296971	5.91769e+06	60H	1.5	14.9	NA	NA	82	Raining, sheltered coriolis with umbrella, no wind, some water birds	NA	Rain	0.3 85/ 0.5 84/ 1 83/ 3 75/ 5 63/ 10 25	415	Y	Y	N	N	N	Small	4
P30	Control – sampling	Control	Sample	0.08	1.81316	2.20pm	2017-07-27	02:00:00	2017-07-27	Winter	Western Springs	1850000	13	-36.8649	174.722	296971	5.91769e+06	60H	1.5	negative for above	NA	NA	NA	NA	NA	NA	NA	NA	Y	Y	N	N	N	Small	NA	NA	NA
-P30	Control – extraction	Control	Control	<0.05	1.20547	NA	NA	NA	NA	NA	NA	NA	NA	NA	NA	NA	NA	NA	NA	NA	NA	NA	NA	NA	NA	NA	NA	NA	N	N	N	N	N	Small	NA	NA	NA
P31	Sample	Sample	Sample	<0.05	1.1218	4.30pm	2017-07-27	05:00:00	2017-07-27	Winter	Warren Freer Park	14097	36	-36.8835	174.737	298281	5.91566e+06	60H	4	12.5	NA	NA	97.3	Cloudy, some rain, light wind.	NA	Rain	0.3 54/ 0.5 52/ 1 57/ 3 43/ 5 35/ 10 9	250	N	N	N	N	N	Medium	4	1	4
P32	Sample	Sample	Sample	0.08	6.02294	12.10pm	2017-07-27	00:00:00	2017-07-27	Winter	Mt Albert Park	404963	103	-36.8902	174.72	296864	5.91488e+06	60H	2.4	19.3	NA	NA	60.5	Overcast, no wind, dry, dogs and people around, near trees and grass.	NA	Overcast	0.3 29/ 0.5 29/ 1 29/ 3 25/ 5 21/ 10 1	134	N	N	Y	N	N	Small	4	1	4
P33	Control – sampling	Control	Sample	0.03	0.784931	11.59am	2017-07-28	00:00:00	2017-07-28	Winter	Windmill Park	23479	74	-36.8884	174.766	300915	5.91518e+06	60H	4.3	NA	NA	NA	NA	NA	NA	NA	NA	NA	N	N	N	N	N	Large	NA	NA	NA
P36	Sample	Sample	Sample	0.04	0.580166	12.50pm	2017-08-01	01:00:00	2017-08-01	Winter	Warren Freer Park	14097	36	-36.8835	174.737	298281	5.91566e+06	60H	4	NA	NA	NA	NA	NA	NA	NA	NA	NA	N	N	N	N	N	Large	1
P37	Sample	Sample	Sample	0.05	8.37774	4.12pm	2017-08-01	04:00:00	2017-08-01	Winter	Western Springs	1850000	13	-36.8649	174.722	296971	5.91769e+06	60H	1.5	18.8	NA	NA	65.7	Sunny, high cloud, dry, no wind, people and birds around.	NA	Fine	0.3 75/ 0.5 75/ 1 74/ 3 66/ 5 57/ 10 23	370	Y	Y	N	N	N	Medium	1	2	2
P38	Sample	Sample	Sample	0.44	2.13902	2.30pm	2017-08-01	03:00:00	2017-08-01	Winter	Mt Albert Park	404963	103	-36.8902	174.72	296864	5.91488e+06	60H	2.4	20.8	NA	NA	61.7	Patchy cloud, sunny, dry, on grass near trees, dogs and people about. No - light wind, NE.	NE	Fine	0.3 72/ 0.5 72/ 1 71/ 3 65/ 5 56/ 10 28	364	N	N	Y	N	N	Large	1	2	2
P39	Control – sampling	Control	Sample	0.02	0.184949	1.25pm	2017-08-09	01:00:00	2017-08-09	Winter	Mt Eden Domain	348552	153	-36.875	174.765	300813	5.91667e+06	60H	2.8	NA	NA	NA	NA	NA	NA	NA	NA	NA	N	N	N	N	N	Small	NA	NA	NA
P40	Sample	Sample	Sample	<0.05	0.595579	1.25pm	2017-08-09	01:00:00	2017-08-09	Winter	Mt Eden Domain	348552	153	-36.875	174.765	300813	5.91667e+06	60H	2.8	16.2	NA	NA	93.4	Raining - light to moderate wind S. Odd person and dog around.	S	Rain	0.3 4276/ 0.5 4275/ 1 4273/ 3 4230/ 5 3838/ 10 1607	22499	N	N	N	N	N	Small	1	2	2
P41	Control – sampling	Control	Sample	<0.05	0.733189	3.30pm	2017-08-10	04:00:00	2017-08-10	Winter	Windmill Park	23479	74	-36.8884	174.766	300915	5.91518e+06	60H	4.3	NA	NA	NA	NA	NA	NA	NA	NA	NA	N	N	N	N	N	Large	NA	NA	NA
P42	Sample	Sample	Sample	0.26	0.673742	12.30pm	2017-08-10	01:00:00	2017-08-10	Winter	Keith Hay Park	582988	55	-36.9167	174.742	298828	5.91198e+06	60H	1.8	20.8	NA	NA	71.3	Sunny, some cloud, dry, no wind, odd person around.	NA	Fine	0.3 51/ 0.5 51/ 1 50/3 41/ 5 32/ 10 8	233	N	N	N	N	N	Small	5	2	4
P43	Sample	Sample	Sample	0.13	1.96728	3.30pm	2017-08-10	04:00:00	2017-08-10	Winter	Windmill Park	23479	74	-36.8884	174.766	300915	5.91518e+06	60H	4.3	16.4	NA	NA	78	Overcast, dry, light wind, S, some kids around.	S	Overcast	0.3 75/ 0.5 75/ 1 74/ 3 63/ 5 52/ 10 19	358	N	N	N	N	N	Medium	5	2	4
P44	Sample	Sample	Sample	0.31	1.31336	4.45pm	2017-08-10	05:00:00	2017-08-10	Winter	The Museum	710007	63	-36.8592	174.775	301678	5.91844e+06	60H	1.4	14.2	NA	NA	80.1	Sunny, high cloud, light wind SW, dry. Afew cars and people about.	SW	Fine	0.3 75/ 0.5 74/ 1 73/ 3 62/ 5 50/ 10 18	352	N	N	N	N	N	Medium	5
P45	Sample	Sample	Sample	0.17	3.51623	2.00pm	2017-08-10	02:00:00	2017-08-10	Winter	Cornwall Park	1700000	94	-36.8986	174.785	302685	5.91408e+06	60H	2.9	18	NA	NA	79.1	Sunny, some cloud, dry, no wind.	NA	Fine	0.3 79/ 0.5 79/ 1 78/ 3 68/ 5 57/ 10 22	383	N	N	N	N	N	Medium	5	1	5
-P45	Control – extraction	Control	Control	<0.05	1.58638	NA	NA	NA	NA	NA	NA	NA	NA	NA	NA	NA	NA	NA	NA	NA	NA	NA	NA	NA	NA	NA	NA	NA	N	N	N	N	N	Small	NA	NA	NA
P46	Sample	Sample	Sample	0.06	8.30618	2.50pm	2017-07-19	03:00:00	2017-07-19	Winter	Windmill Park	23479	74	-36.8884	174.766	300915	5.91518e+06	60H	4.3	21.3	NA	NA	64.1	Sunny, some patchy cloud, no wind. In middle of park, children playing sport and a pupper around.	NA	Fine	0.3 12/ 0.5 12/ 1 12/ 3 11/ 5 10/ 10 6	63	N	N	N	N	N	Small	1	2	5
P47	Sample	Sample	Sample	<0.05	8.92598	10.55am	2017-07-19	23:00:00	2017-07-18	Winter	Cornwall Park	1700000	94	-36.8986	174.785	302685	5.91408e+06	60H	2.9	17	NA	NA	78.9	Overcast. No wind. Dry. In clearing.	NA	Overcast	0.3 29/ 0.5 29/ 1 29/ 3 26/ 5 22/ 10 8	143	N	N	N	N	N	Large	1	1	5
P48	Sample	Sample	Sample	<0.05	9.35862	1.00pm	2017-07-19	01:00:00	2017-07-19	Winter	Keith Hay Park	582988	55	-36.9167	174.742	298828	5.91198e+06	60H	1.8	19.2	NA	NA	71.8	Overcast, some sun, was light rain before sample, light - no wind. By playing field and golf course.	NA	Overcast	0.3 32/ 0.5 31/ 1 30/ 3 26/ 5 22/ 10 10	151	N	N	N	N	N	Small	1	1	1
P49	Control – sampling	Control	Sample	<0.05	5.70038	10.55am	2017-07-19	23:00:00	2017-07-18	Winter	Cornwall Park	1700000	94	-36.8986	174.785	302685	5.91408e+06	60H	2.9	NA	NA	NA	NA	NA	NA	NA	NA	NA	N	N	N	N	N	Small	NA	NA	NA
P51	Sample	Sample	Sample	<0.05	6.30147	1.30pm	2017-07-28	02:00:00	2017-07-28	Winter	Mt Eden Domain	348552	153	-36.875	174.765	300813	5.91667e+06	60H	2.8	15.2	NA	NA	86.2	Overcast, some rain, no wind. Sunny. A few people and dogs about.	NA	Overcast	0.3 76/ 0.5 75/ 1 74/ 3 66/ 5 57/ 10 27	375	N	N	N	N	N	Medium	4
P52	Sample	Sample	Sample	<0.05	14.11	3.00pm	2017-07-28	03:00:00	2017-07-28	Winter	The Museum	710007	63	-36.8592	174.775	301678	5.91844e+06	60H	1.4	15.9	NA	NA	78.4	Sunny, light wind NE, dry, patchy cloud, plenty of blue sky, amoung trees, people and cars nearby.	NE	Fine	0.3 36/ 0.5 36/ 1 36/ 3 32/ 5 27/ 10 13	180	N	N	N	N	N	Medium	4	1	1
P54	Sample	Sample	Sample	<0.05	6.95869	12.10pm	2017-07-31	00:00:00	2017-07-31	Winter	Fijoa Forest	14682	16	-36.8506	174.773	301492	5.91938e+06	60H	0.8	19.3	NA	NA	56.4	Clear sky, sunny, dry, people nearby on grass. No wind.	NA	Fine	0.3 31/ 0.5 31/ 1 31/ 3 29/ 5 25/ 10 11	158	N	N	N	N	Y	Large	3	6	2
P55	Sample	Sample	Sample	0.38	10.8294	3.35pm	2017-07-31	04:00:00	2017-07-31	Winter	Keith Hay Park	582988	55	-36.9167	174.742	298828	5.91198e+06	60H	1.8	16.2	NA	NA	61.6	Clear sky, sunny, no wind, dry, some high cloud.	NA	Fine	0.3 28/ 0.5 28/ 1 28/ 3 26/ 5 23/ 10 11	144	N	N	N	N	N	Medium	1	6	2
P56	Control – sampling	Control	Sample	<0.05	4.7261	3.35pm	2017-07-31	04:00:00	2017-07-31	Winter	Keith Hay Park	582988	55	-36.9167	174.742	298828	5.91198e+06	60H	1.8	NA	NA	NA	NA	NA	NA	NA	NA	NA	N	N	N	N	N	Large	NA	NA	NA
P57	Sample	Sample	Sample	<0.05	0.859791	11.30am	2017-08-09	00:00:00	2017-08-09	Winter	Fijoa Forest	14682	16	-36.8506	174.773	301492	5.91938e+06	60H	0.8	15.7	NA	NA	93.8	Raining - light to moderate wind E, odd person around.	E	Rain	0.3 392/ 0.5 390/ 1 386/ 3 333/ 5 213/ 10 102	1816	N	N	N	N	Y	Small	1
-P57	Control – extraction	Control	Control	<0.05	0.726584	NA	NA	NA	NA	NA	NA	NA	NA	NA	NA	NA	NA	NA	NA	NA	NA	NA	NA	NA	NA	NA	NA	NA	N	N	N	N	N	Small	NA	NA	NA
P58/P73	Sample	Sample	Sample	<0.05	3.02193	4.30pm	2018-03-20	04:00:00	2018-03-20	Autumn	Mt Albert Park	404963	103	-36.8902	174.72	296864	5.91488e+06	60H	2.4	27.2	0.6	1.2	58	Still warm, sunny, some cloud, little wind	NA	Fine	0.3 34/ 0.5 34/ 1 33/ 3 27/ 5 22/ 10 5	155	N	N	Y	N	N	Large	6	6	4
P59	Sample	Sample	Sample	<0.05	1.52913	6.00pm	2018-03-20	05:00:00	2018-03-20	Autumn	Keith Hay Park	582988	55	-36.9167	174.742	298828	5.91198e+06	60H	1.8	22.6	1.3	2	58.6	E Wind, sunny, little cloud	E	Fine	0.3 33/ 0.5 33/ 1 32/ 3 26/ 5 21/10 8	153	N	N	N	N	N	Large	6
P60	Sample	Sample	Sample	<0.05	4.15254	3.10pm	2018-03-20	02:00:00	2018-03-20	Autumn	Western Springs	1850000	13	-36.8649	174.722	296971	5.91769e+06	60H	1.5	27.9	0.9	2.2	53.4	Sunny, some cloud, gusty SW wind	SW	Fine	0.3 65/ 0.5 65/ 1 64/ 3 55/ 5 48/ 10 23	320	Y	Y	N	N	N	Medium	6	5	5
P61	Control – sampling	Control	Sample	<0.05	1.29134	12.45pm	2018-03-21	00:00:00	2018-03-21	Autumn	Cornwall Park	1700000	94	-36.8986	174.785	302685	5.91408e+06	60H	2.9	NA	NA	NA	NA	NA	NA	NA	NA	NA	N	N	N	N	N	Medium	NA	NA	NA
P63	Sample	Sample	Sample	<0.05	3.70778	2.30pm	2018-03-21	02:00:00	2018-03-21	Autumn	Windmill Park	23479	74	-36.8884	174.766	300915	5.91518e+06	60H	4.3	25	1.3	2.5	60	N - W shifting wind, fine and sunny	NW	Fine	0.3 35/ 0.5 35/ 1 34/ 3 27/ 5 22/ 10 11	164	N	N	N	N	N	Medium	6	5	5
P64	Sample	Sample	Sample	<0.05	1.26932	12.45pm	2018-03-21	00:00:00	2018-03-21	Autumn	Cornwall Park	1700000	94	-36.8986	174.785	302685	5.91408e+06	60H	2.9	27.3	0.5	0.8	54.6	E - S shifting wind, sunny, few clouds	SE	Fine	0.3 40/ 0.5 40/ 1 39/ 3 32/ 5 26/ 10 10	187	N	N	N	N	N	Large	6	5	5
P66	Control – sampling	Control	Sample	<0.05	2.07737	11.45am	2018-03-23	23:00:00	2018-03-22	Autumn	Mt Eden Domain	348552	153	-36.875	174.765	300813	5.91667e+06	60H	2.8	NA	NA	NA	NA	NA	NA	NA	NA	NA	N	N	N	N	N	Large	NA	NA	NA
P67	Sample	Sample	Sample	<0.05	2.12691	3.35pm	2018-03-23	03:00:00	2018-03-23	Autumn	Fijoa Forest	14682	16	-36.8506	174.773	301492	5.91938e+06	60H	0.8	20.9	0.6	1.1	71.3	Waited for rain to stop, sunny and cloudy NE Wind	NE	Rain	0.3 52/ 0.5 52/ 1 51/ 3 42/ 5 34/ 10 7	238	N	N	N	N	Y	Large	6	5	5
P68	Sample	Sample	Sample	0.01	0.01	1.30pm	2018-03-23	01:00:00	2018-03-23	Autumn	The Museum	710007	63	-36.8592	174.775	301678	5.91844e+06	60H	1.4	22.7	0.7	1.6	69.8	Light rain, sun and patchy cloud	NA	Rain	0.3 98/ 0.5 98/ 1 97/ 3 84/ 5 70/ 10 30	477	N	N	Y	N	Y	Small	6	5	5
P69	Sample	Sample	Sample	<0.05	3.3599	2.00pm	2018-03-26	01:00:00	2018-03-26	Autumn	Mt Albert Park	404963	103	-36.8902	174.72	296864	5.91488e+06	60H	2.4	24.1	1	1.8	75	Sunny, fine, light wind E shifting, some patchy cloud, small 0.3 w/c	E	Fine	0.3 60/ 0.5 60/ 1 59/ 3 51/ 5 42/ 10 15	287	N	N	Y	Y	N	Small	1	5	5
P70	Control – sampling	Control	Sample	<0.05	1.04584	2.00pm	2018-03-26	01:00:00	2018-03-26	Autumn	Mt Albert Park	404963	103	-36.8902	174.72	296864	5.91488e+06	60H	2.4	NA	NA	NA	NA	NA	NA	NA	NA	NA	N	N	Y	N	N	Small	NA	NA	NA
P71	Sample	Sample	Sample	<0.05	5.88753	3.20pm	2018-03-26	02:00:00	2018-03-26	Autumn	Warren Freer Park	14097	36	-36.8835	174.737	298281	5.91566e+06	60H	4	26.1	1.2	2	67.6	Sunny, fine, light wind NE, some patchy cloud, small 0.2 w/c	NE	Fine	No data	NA	N	Y	N	N	N	Medium	1
P72	Sample	Sample	Sample	<0.05	4.03474	4.40pm	2018-03-26	04:00:00	2018-03-26	Autumn	Western Springs	1850000	13	-36.8649	174.722	296971	5.91769e+06	60H	1.5	25.6	0.4	0.8	70	Overcast, small patches of blue sky visible, light wind, NE	NE	Overcast	0.3 88/ 0.5 88/ 1 87/ 3 77/ 5 65/ 10 24	429	Y	Y	N	N	N	Medium	1	5	1
P58/P73	Sample	Sample	Sample	<0.05	1.27703	4.30pm	2018-03-20	04:00:00	2018-03-20	Autumn	Mt Albert Park	404963	103	-36.8902	174.72	296864	5.91488e+06	60H	2.4	27.2	0.6	1.2	58	Still warm, sunny, some cloud, little wind	NA	Fine	0.3 34/ 0.5 34/ 1 33/ 3 27/ 5 22/ 10 5	155	N	N	Y	N	N	Small	6	5	1
-P73	Control – extraction	Control	Control	<0.05	1.96838	NA	NA	NA	NA	NA	NA	NA	NA	NA	NA	NA	NA	NA	NA	NA	NA	NA	NA	NA	NA	NA	NA	NA	N	N	N	N	N	Large	NA	NA	NA
-BH5/78.15	Control – extraction	Control	Control	<0.05	0.0591188	NA	NA	NA	NA	NA	NA	NA	NA	NA	NA	NA	NA	NA	NA	NA	NA	NA	NA	NA	NA	NA	NA	NA	N	N	N	N	N	Medium	NA	NA	NA
P8	Sample	Sample	Sample	0.04	0.0691578	12.30pm	2018-03-22	00:00:00	2018-03-22	Autumn	Aotea Square	0	21	-36.8523	174.763	300568	5.91917e+06	60H	1.3	25	1	2	53.7	W-N-E shifting wind, sunny, a few clouds in the sky	N	Fine	0.3 54/ 0.5 53/ 1 52/ 3 43/ 5 36/ 10 12	250	N	Y	N	N	Y	Medium	6
P9	Sample	Sample	Sample	0.05	0.0892359	1.20pm	2018-03-28	00:00:00	2018-03-28	Autumn	Cornwall Park	1700000	94	-36.8986	174.785	302685	5.91408e+06	60H	2.9	22.8	0.5	1	79.9	Less overcast, some sun, very light N wind	N	Fine	0.3 60/ 0.5 60/ 1 60/ 3 54/ 5 44/ 10 13	291	N	N	N	N	N	Medium	1
P10	Sample	Sample	Sample	0.04	0.0457334	2.50pm	2018-03-28	02:00:00	2018-03-28	Autumn	Fijoa Forest	14682	16	-36.8506	174.773	301492	5.91938e+06	60H	0.8	22.1	0.9	1.1	74.9	Overcast again, 90% cloud cover, dry, NW wind	NW	Overcast	0.3 77/ 0.5 76/ 1 75/ 3 68/ 5 59/ 10 31	386	N	N	N	N	Y	Medium	1	1	1
P11	Control – sampling	Control	Sample	0.04	0.0959286	11.50am	2018-03-28	23:00:00	2018-03-27	Autumn	The Museum	710007	63	-36.8592	174.775	301678	5.91844e+06	60H	1.4	NA	NA	NA	NA	NA	NA	NA	NA	NA	N	N	N	N	N	Small	NA	NA	NA
P12	Sample	Sample	Sample	<0.05	0.0368098	11.50am	2018-03-28	23:00:00	2018-03-27	Autumn	The Museum	710007	63	-36.8592	174.775	301678	5.91844e+06	60H	1.4	21.8	0.7	1.1	76.9	Overcast, light wind, NW shifting.	NW	Overcast	0.3 64/ 0.5 64/ 1 63/ 3 56/ 5 47/ 10 19	313	N	N	Y	Y	Y	Large	1	1	1
P13	Control – sampling	Control	Sample	<0.05	0.158394	12.30pm	2018-04-12	01:00:00	2018-04-12	Autumn	Rural location	NA	100	-36.348	174.353	262482	5.9742e+06	60H	4.9	NA	NA	NA	NA	NA	NA	NA	NA	NA	N	N	N	N	N	Medium	NA	NA	NA
P14	Sample	Sample	Sample	0.04	0.0591188	12.30pm	2018-04-12	01:00:00	2018-04-12	Autumn	Rural location	NA	100	-36.348	174.353	262482	5.9742e+06	60H	4.9	17.1	2.4	3.6	51.6	Sunny, 60% cloud, some SW wind	SW	Fine	0.3 63/ 0.5 63/ 1 62/ 3 55/ 5 47/ 10 18	308	N	N	N	N	N	Large	5
P15	Sample	Sample	Sample	0.05	0.68377	2.45pm	2018-05-30	03:00:00	2018-05-30	Autumn	Rural location	NA	100	-36.348	174.353	262482	5.9742e+06	60H	4.9	14.3	1.4	2.2	67.1	Sunny, patchy cloud, light wind, fine S wind.	S	Fine	0.3 34/ 0.5 34/ 1 34/ 3 29/ 5 24/ 10 9	164	N	N	N	N	N	Large	3	1	1
P16	Sample	Sample	Sample	<0.05	1.14445	4.48pm	2018-05-31	05:00:00	2018-05-31	Autumn	Aotea Square	0	21	-36.8523	174.763	300568	5.91917e+06	60H	1.3	12.8	0.5	1.1	67.2	clear sky, light W wind	W	Fine	0.3 30/ 0.5 30/ 1 30/ 3 27/ 5 24/ 10 16	157	N	Y	N	N	Y	Small	3	1	1
P17	Control – sampling	Control	Sample	0.08	0.103737	1.30pm	2018-06-01	02:00:00	2018-06-01	Autumn	Mt Albert Park	404963	103	-36.8902	174.72	296864	5.91488e+06	60H	2.4	NA	NA	NA	NA	NA	NA	NA	NA	NA	N	N	Y	N	N	Large	NA	NA	NA
P18	Sample	Sample	Sample	0.06	5.88846	4.48pm	2018-06-01	05:00:00	2018-06-01	Autumn	Fijoa Forest	14682	16	-36.8506	174.773	301492	5.91938e+06	60H	0.8	14.6	0	0	75.1	Dry, becoming more overcast, still sunny, no wind	NA	Fine	0.3 27/ 0.5 26/ 1 25/ 3 23/ 5 20/ 10 12	133	N	N	N	N	Y	Small	1	1	1
P19	Sample	Sample	Sample	<0.05	0.129392	3.21pm	2018-06-01	03:00:00	2018-06-01	Autumn	The Museum	710007	63	-36.8592	174.775	301678	5.91844e+06	60H	1.4	15.2	0.8	1.4	76.8	Sunny, light wind, odd high cloud E wind	E	Fine	0.3 21/ 0.5 20/ 1 20/ 3 19/ 5 17/ 10 9	106	N	N	N	N	Y	Large	1
P20	Sample	Sample	Sample	0.02	0.880089	1.30pm	2018-06-01	02:00:00	2018-06-01	Autumn	Mt Albert Park	404963	103	-36.8902	174.72	296864	5.91488e+06	60H	2.4	19.7	0.5	1	61.2	Sunny, light wind, odd cloud E shifting wind	E	Fine	0.3 16/ 0.5 15/ 1 15/ 3 13/5 11/ 10 5	75	N	N	Y	Y	N	Large	3	4	4
-P20	Control – extraction	Control	Control	<0.05	0.327942	NA	NA	NA	NA	NA	NA	NA	NA	NA	NA	NA	NA	NA	NA	NA	NA	NA	NA	NA	NA	NA	NA	NA	N	N	N	N	N	Large	NA	NA	NA
P74	Control – sampling	Control	Sample	<0.05	1.13441	11.25am	2018-03-27	22:00:00	2018-03-26	Autumn	Mt Eden Domain	348552	153	-36.875	174.765	300813	5.91667e+06	60H	2.8	NA	NA	NA	NA	NA	NA	NA	NA	NA	N	N	N	N	N	Large	NA	NA	NA
P75	Sample	Sample	Sample	<0.05	1.33854	11.25am	2018-03-27	22:00:00	2018-03-26	Autumn	Mt Eden Domain	348552	153	-36.875	174.765	300813	5.91667e+06	60H	2.8	25.6	0.9	1.7	64.9	Warm and sunny, some cloud, slight N wind	N	Fine	0.3 47/ 0.5 47/ 1 47/ 3 42/ 5 37/ 10 17	237	N	N	N	N	N	Medium	1	4	3
P76	Sample	Sample	Sample	<0.05	0.10039	1.10pm	2018-03-27	00:00:00	2018-03-27	Autumn	Windmill Park	23479	74	-36.8884	174.766	300915	5.91518e+06	60H	4.3	26.6	0.9	1.5	64.5	Warm and sunny, some cloud, slight NW wind	NW	Fine	0.3 49/ 0.5 49/ 1 49/ 3 44/ 5 38/ 10 21	250	N	N	N	N	N	Medium	1
P77	Sample	Sample	Sample	<0.05	4.26882	4.30pm	2018-03-27	04:00:00	2018-03-27	Autumn	Keith Hay Park	582988	55	-36.9167	174.742	298828	5.91198e+06	60H	1.8	25	1.8	2.4	71.1	Sunny, a few clouds, light wind, odd person around. NW wind.	NW	Fine	0.3 30/ 0.5 30/ 1 29/ 3 24/ 5 19/ 10 5	137	N	N	N	N	N	Medium	1	4	3
P78	Control – sampling	Control	Sample	<0.05	2.56553	1.10pm	2018-04-17	01:00:00	2018-04-17	Autumn	Rural location	NA	100	-36.348	174.353	262482	5.9742e+06	60H	4.9	NA	NA	NA	NA	NA	NA	NA	NA	NA	N	N	N	N	N	Large	NA	NA	NA
P79	Sample	Sample	Sample	0.09	6.628	1.10pm	2018-04-17	01:00:00	2018-04-17	Autumn	Rural location	NA	100	-36.348	174.353	262482	5.9742e+06	60H	4.9	25.2	0.8	2	64.8	Overcast, some sun/wind 70% clouds, SW - W wind.	SW	Overcast	0.3 190/ 0.5 189/ 1 186/ 3 160/ 5 133/10 51	909	N	N	N	N	N	Large	4	4	3
P80	Sample	Sample	Sample	<0.05	7.56386	1.10pm	2018-04-19	01:00:00	2018-04-19	Autumn	Mt Eden Domain	348552	153	-36.875	174.765	300813	5.91667e+06	60H	2.8	18.9	0.5	1.9	58.1	Patchy cloud, sun, dry, W wind shifting.	W	Fine	0.3 67/ 0.5 67/ 1 66/ 3 58/ 5 50/ 10 22	330	N	N	N	N	N	Medium	2	4	3
P81	Sample	Sample	Sample	<0.05	6.50307	2.30pm	2018-04-18	03:00:00	2018-04-18	Autumn	Keith Hay Park	582988	55	-36.9167	174.742	298828	5.91198e+06	60H	1.8	19.2	1.5	2.9	57.9	Sunny and windy, showers but not while sampling, W - S shifting wind, More W.	W	Fine	0.3 76/ 0.5 76/ 1 74/ 3 60/ 5 49/ 10 17	352	N	N	N	N	N	Small	2
P82	Control – sampling	Control	Sample	<0.05	2.57892	2.30pm	2018-04-18	03:00:00	2018-04-18	Autumn	Keith Hay Park	582988	55	-36.9167	174.742	298828	5.91198e+06	60H	1.8	NA	NA	NA	NA	NA	NA	NA	NA	NA	N	N	N	N	N	Small	NA	NA	NA
P83	Sample	Sample	Sample	<0.05	3.89069	4.25pm	2018-04-18	04:00:00	2018-04-18	Autumn	Western Springs	1850000	13	-36.8649	174.722	296971	5.91769e+06	60H	1.5	17.8	1.2	1.8	56.3	Was showery, now dry, sun, W wind	W	Rain	0.3 65/ 0.5 65/ 1 63/ 3 50/ 5 39/ 10 13	295	Y	Y	N	N	N	Small	2	4	3
P84	Control – sampling	Control	Sample	<0.05	1.65421	11.35am	2018-04-19	00:00:00	2018-04-19	Autumn	Warren Freer Park	14097	36	-36.8835	174.737	298281	5.91566e+06	60H	4	NA	NA	NA	NA	NA	NA	NA	NA	NA	N	N	N	N	N	Large	NA	NA	NA
P85	Sample	Sample	Sample	<0.05	1.48578	11.35am	2018-04-19	1900-01-01	2018-04-19	Autumn	Warren Freer Park	14097	36	-36.8835	174.737	298281	5.91566e+06	60H	4	18.8	1.8	2.4	59.2	Patchy cloud, sun, dry, SW wind.	SW	Fine	0.3 67/ 0.5 67/ 1 66/ 3 57/ 5 47/ 10 18	322	N	N	N	N	N	Small	2	2	4
P86	Sample	Sample	Sample	<0.05	1.88065	3.00pm	2018-04-19	03:00:00	2018-04-19	Autumn	Windmill Park	23479	74	-36.8884	174.766	300915	5.91518e+06	60H	4.3	22.4	0.3	0.7	56.4	Fewer clouds in sky, sunny, little wind. SW shifting.	SW	Fine	0.3 53/ 0.5 53/ 1 52/ 3 44/ 5 35/ 10 9	246	N	N	N	N	Y	Small	2	1	5
P87	Sample	Sample	Sample	0.07	3.3865	4.25pm	2018-04-19	04:00:00	2018-04-19	Autumn	Cornwall Park	1700000	94	-36.8986	174.785	302685	5.91408e+06	60H	2.9	16.3	0.6	0.8	69.7	overcast, bits of blue visible, little NE wind	NE	Overcast	0.3 76/ 0.5 76/ 1 75/ 3 66/ 5 57/ 10 22	372	N	N	Y	N	N	Medium	2
P88	Sample	Sample	Sample	<0.05	0.120468	2.30pm	2018-04-18	03:00:00	2018-04-18	Autumn	Keith Hay Park	582988	55	-36.9167	174.742	298828	5.91198e+06	60H	1.8	19.2	1.5	2.9	57.9	Sunny and windy, showers but not while sampling, W - S shifting wind, More W.	W	Rain	0.3 76/ 0.5 76/ 1 74/ 3 60/ 5 49/ 10 17	352	N	N	N	N	N	Medium	2	2	5
-P87	Control – extraction	Control	Control	<0.05	0.0580033	NA	NA	NA	NA	NA	NA	NA	NA	NA	NA	NA	NA	NA	NA	NA	NA	NA	NA	NA	NA	NA	NA	NA	N	N	N	N	N	Large	NA	NA	NA
P26	Sample	Sample	Sample	0.02	19.4947	12.15pm	2017-07-14	00:00:00	2017-07-14	Winter	The Museum	710007	63	-36.8592	174.775	301678	5.91844e+06	60H	1.4	9.7	NA	NA	85.9	Raining, sampled in area shelterd by tree. Light - Moderate wind E. Cloudy.	E	Rain	0.3 78/ 0.5 78/ 1 77/ 3 64/ 5 52/ 10 18	367	N	N	N	N	N	NA	3
P28	Sample	Sample	Sample	0.17	25.9777	2.55pm	2017-07-14	03:00:00	2017-07-14	Winter	Fijoa Forest	14682	16	-36.8506	174.773	301492	5.91938e+06	60H	0.8	11.7	NA	NA	77.6	Light - moderate wind N, overcast, dry.	N	Overcast	0.3 88/ 0.5 87/ 1 85/ 3 69/ 5 57/ 10 18	404	N	N	Y	N	Y	NA	3
P34	Sample	Sample	Sample	0.05	10.4875	11.59am	2017-07-28	00:00:00	2017-07-28	Winter	Windmill Park	23479	74	-36.8884	174.766	300915	5.91518e+06	60H	4.3	15.2	NA	NA	81.6	Cloudy, some patches of sun, No - light N wind. On grass, no one around.	N	Overcast	0.3 55/ 0.5 55/ 1 54/ 3 48/ 5 40/ 10 16	268	N	N	N	N	N	NA	4
P35	Sample	Sample	Sample	0.14	24.7574	12.50pm	2017-08-01	01:00:00	2017-08-01	Winter	Warren Freer Park	14097	36	-36.8835	174.737	298281	5.91566e+06	60H	4	15.7	NA	NA	71.4	Overcast, some sun, no - light S wind.	S	Overcast	0.3 91/ 0.5 91/ 1 90/ 3 84/ 5 75/ 10 41	472	N	N	N	N	N	NA	1
P50	Sample	Sample	Sample	0.68	21.7658	12.00pm	2017-07-22	00:00:00	2017-07-22	Winter	Rural location	NA	100	-36.348	174.353	262482	5.9742e+06	60H	4.9	13.5	NA	NA	84.4	Wind 256 W, 90% cloud, showers, moderate rain	W	Overcast	0.3 74/ 0.5 74/ 1 73/ 3 64/ 5 53/ 10 21	359	N	N	N	N	N	NA	5
P53	Sample	Sample	Sample	0.02	16.0167	1.45pm	2017-07-31	02:00:00	2017-07-31	Winter	Cornwall Park	1700000	94	-36.8986	174.785	302685	5.91408e+06	60H	2.9	19.4	NA	NA	55.5	Clear sky, some high cloud, dry, on grass, trees and odd person and dog nearby. No wind.	NA	Fine	0.3 28/ 0.5 27/ 1 27/ 3 25/ 5 22/ 10 11	140	N	N	Y	N	N	NA	1
P62	Sample	Sample	Sample	0.01	9.95761	4.00pm	2018-03-21	03:00:00	2018-03-21	Autumn	Warren Freer Park	14097	36	-36.8835	174.737	298281	5.91566e+06	60H	4	25.6	1.1	1.9	56.6	NW wind, Fine, slightly more cloud.	NW	Fine	0.3 48/ 0.5 48/ 1 47/ 3 40/ 5 35/ 10 17	235	N	N	N	N	N	NA	6
P65	Sample	Sample	Sample	0.23	9.4512	11.45am	2018-03-23	23:00:00	2018-03-22	Autumn	Mt Eden Domain	348552	153	-36.875	174.765	300813	5.91667e+06	60H	2.8	23.3	1.9	4.3	73	NE wind, sunny, fair bit of cloud.	NE	Fine	0.3 57/ 0.5 57/ 1 56/ 3 47/ 5 40/ 10 15	272	N	N	N	N	N	NA	6
PCR+	Control – PCR+	Sample	Sample	NA	3.97658	NA	NA	NA	NA	NA	NA	NA	NA	NA	NA	NA	NA	NA	NA	NA	NA	NA	NA	NA	NA	NA	NA	NA	N	N	N	N	N	NA	NA	NA	NA
PCR-	Control – PCR-	Control	Control	NA	0.0702733	NA	NA	NA	NA	NA	NA	NA	NA	NA	NA	NA	NA	NA	NA	NA	NA	NA	NA	NA	NA	NA	NA	NA	N	N	N	N	N	NA	NA	NA	NA
